# Supplementary material
Source: PubMed Central journal article supplement (PMC8513482)
Supplement: jvi.00680-21-s0001.pdf [file jvi.00680-21-s0001.pdf]

Sequences of *IFITM* pseudogenes, including 250 nucleotides 5' of the start codon (highlighted in green). Stop codons are highlighted in pink. Putative ISRE motifs are underlined.

***IFITM3P1***

>ENSG00000236562:ENST00000505282.1 cds:processed\_pseudogene  
GRCh38:4:66093892:66094526:1

CCCTGAAAATTAATATGATTAGCCTGAAGACATAGTGAAAAATGACAACCACTTTATTAG  
GTTACTAAGATCATCTTTTCTGTCTATTTCAGAAAAACAAAGGTTTCAATAATTCAGAAT  
TATAATCCACTAGTGATAAAAAACAAATTAATCACTATTATCATTAAATATACAATATTAG  
GGCCCACTGAGAGCCATCCCAGTAACCCGACCACCGCTGGTCTTCACTGGACACCATGAA  
CCACACTGTCCAACCTTCTCTCCTATCAACAGCGGCCAGCCCCCAACTATGAGATGCTC  
AAGGAGGAGCATGAGGTGGCTGTGCTGGGGGTGGCCTACAACCCTGCTCCCCGACGTCC  
ACCGTGATCCACATCCGCAACGAGACCTCCGTGCCCGACCATGTTGTCTGGTCCCTGTTC  
AACACTCTCTTCATGAACCCCTGCTGCCTGGGCTTCATAGCATTTCGCTTACTCCGTGAAG  
TCTAGGCACAGGAAGATGGTTGGCGACCTGACTGGCGCCCAGGCCTATGCCTCCACCGCC  
AAGTGCCTGAACATCTGGGCCCTGATTTTGGGCATCTTCATGACCATTCTGCTCATCATC  
ATCCCAGTGTGATCTTCCAAGCCTATCAATAG

> Open Reading Frame (ORF)

MLKEEHEVAVLGVAYNPAPPTSTVIHIRNETSVDPDHVVWSLFLFMNPC  
CLGFIAFAYSVKSRHRKMGVGLTGAQAYASTAKCLNIWALILGIFMTILL  
IIIPVLIFQAYQ

***IFITM3P2***

>ENSG00000223722:ENST00000453713.1 cds:processed\_pseudogene  
GRCh38:12:31754470:31755121:1

TCAGATAGAACCACAAATAAAAAATAATTCAATACCATAAAAAACAAAGACAAACCTAAAA  
CTAATAGATTTCAGAAGGACAGAAAAATGAAGAGAAAAAAGATAAATGGGCAAACCTGTAC  
TAGGCTAATGCAAACGAAAGTAATTGTTATCTTAATTTCAAATATGGAGAAAACAAACT  
ACTGGGGAAAGGGAGGGTCCACTGAGAACCATCCCAGTAACTCAACCACGGCTGGTCTTC  
GCTGGACACCATGAACCACTGTCCAAACCTTCTTCTCCTGTCAACAGCGGCCAGCC  
CCCCAACTATGAGATGCTCAAGGAGGAGCACAAAGGTGGCTGTGCTGGGGGTGCCCCACAA  
CCCTGCTCCCCCAACCGTCCACCGTATCCACATCCGCAGCAAGACCTCCCGTCCCCACCA  
TGTCGTCTGGTCCCTGTTC AACACCCTTTCATGAACCCCTGCTGCCTGGGCTTCATAGC  
ATTTGCCTACTCCGTGAAGTCTAGGGACAGGAAGATGGTTGGCAACGTGACTGGGGCCCA  
GGCCTATGCCTCCACCACCAAGTGCCTGAACATCTGGGCCCTGATTTTGGGCATCCTCAT  
GACCATTCTGCTCATCATCATCCCAGTATTAATCTTCCAAGCCCATAGATAG

> Open Reading Frame (ORF)

MNHTVQTFVNSGQPPNYEMLKEEHKQVAVLGVPHNPAPPTSTVIHIRS  
KTSVPHHVWSLFLFMNPPCLGFIAFAYSVKSRDRKMGVNVGTGAQAYA  
STTKCLNIWALILGILMTILLIIIPVLIFQHR

***IFITM3P3***

>ENSG00000196114:ENST00000339867.4 cds:processed\_pseudogene  
GRCh38:6:34576258:34576906:-1

AATGGAGCAAGACCCCATTTCTAAAAAATAAATAATTTTTTAAAGTAGAAGAAAACAGA  
TACTGGGGAGGCAACTAGCACTCTTCCCTACACATGCCCTGTACTCTTCCATCTCTGA  
TCTTAAAAACTGCATGCTGGACAAATGCCAGGAAGAGGAACTGTTGAGAAAACGAACT  
ACTGGGGAAAGGGAGGGCCCACTGAGAACCATCCGAGTAACCCGACCACCGCTGGTCTTC  
GCTGGACACCATGAACCACTGTCCAAACCTTCTCCTCTCCTGTCAACAGCGGCCATCC

CCCCCAACTATGAGATGCTCAAGGAGGAGCACGAGGTGGCTGTGCTGAGGGCACCCACA  
ACCCTGCTCCCCGACATCCACCAATGATCCACAGCCGAGCGAGACCTCCGTGCCCGACCG  
TGTCGTCTGATCCCTGTTCAACACCCTCTTCGTGAACCCCTGCTGCCTGGGCTTCATAGC  
ATTTGCTTATTCCGTGAAGTCTAGGGACAGGAAGATGGTTGGTGACCTGACTGGGGCCCA  
GGCGTATGCCTCCACCGCCAAGTGCCTGAACATCTGAGCCCTGATTGTGGACATCCTCAT  
GACCATTCTGCTCATCATCATCCGGGTGTTGATCTTCCAAGCCTATCGA

> Open Reading Frame (ORF)  
MLKEEHEVAVLRAPHNPAPRHPP

***IFITM3P4:***

>ENSG00000230191:ENST00000442064.1 cds:processed\_pseudogene  
GRCh38:7:56162895:56163533:1

AGATAATTCTGTCACTGGCCCTTATTAGGGTTATGCCCTGAAAAGCTAATAAGTTAATGG  
CATTTCTCCAAAGTTAGAGAATCATAGAAAGCCGTTTAAAACCATTGGGGTCAGTACTTC  
TTTTGGTTTGGACATATACTTACATGCCTTCTCTTGTTCAGATAACTCCCTGCACTAT  
CAGTACCTTTCCATCATGTTGGTTAAAGGATATAATCGAACCCGACCACCGCTGGTCTTC  
GCTGGACACCAATGAACACACTGTCCAAACCTTCTTCTCTCTGTCAACAGCGGCCAGCC  
CCTCAACTATGAGATGCTCAAGGAGGAGCATGAGGTGGCTGTGCCAGGGGTGCCCCACAA  
CCCTGCTCCCCCGACGATGATCCACATCTGCAGCGAGACCTCCATGCCCAACCATGTTGTC  
TGGTCCCTGTTCAACACCCTCTTCATGAACCCCTGCTGCCTGGGCTTCATAGCGTTCACC  
TACTCCATGAAGTCTAGGGACAGGAAGATGGTTGGCGACCTGACCGGGGCCAGGCCTAT  
GCCTCCACCGCCAAGTGCCTGAACATCTGGGCCCTGACTTTGGGCATCCTCATGACCATT  
CTGCTCATCGTCATCCCAGTGTTGATCATCCAAGCCCAT

> Open Reading Frame (ORF)  
MNHTVQTFVSPVNSGQPLNYEMLKEEHEVAVPGVPHNPAPPT

***IFITM3P5:***

>ENSG00000238168:ENST00000549333.2 cds:processed\_pseudogene  
GRCh38:12:111581129:111581773:1

CCATCTCAAAAAAAAAAAAAAAAAAAGAAATGTATTAGAAATAAAAAGTACATCAGATTCT  
AATGCCAGTTATGCAGCCAATGATGAGATACTCTGGTAAATAACCCTCTTGGTCTCAATT  
TCTTACCCCGTAAATAGAATGAGTACTAAAAAACCACCAGAGCCAGAGAAATCCAAACTA  
CCAGGGAAAGGGAGGGGCCCACTGAGAACCACCCAGCAACCCGACCACAGCTGGTCTTC  
CCTGGACACCAATGAACACAATGTCCAAACCTCTTCACTCCTGCCAACATCGGCCATCCC  
CCTAACTATGAGATGCTCAAGGAGGAGCAAGAGGTGGCTGTGCTGGGGGCACCCACAAC  
CCTGCTCCCCAATGTCCACCGTGATCCCATCCACAGCGAGAACTCCGTGCCCGACCAT  
GTCGTCTGGTCCCTGTTCAACACCCACTTCATGAACCTCTGCTGCCTGGGCTTCATAGCA  
TTGGCCTACTCCGTGAAGTCTAGGGACAAGAAGATGGTTGGCGACCTGATCAGGGCCCAG  
GCCTATGCCTTTACCGCCAAGTGCCTGAACATCTGGGCCCTGATTGTGCGCATCATTACG  
ACCATTCTGCTCAGCATCATCCCAGTGTTGATCTTTCAAGTCTATCAACAGATCAGGAGG  
CATTATCTAGGCCAGGAGCTCTGCCCCGATG

> Open Reading Frame (ORF)  
MLKEEQEVAVLGLAPHNPAPPSTVIPIHSENSVPDHSVWVSLFNTHFMNSCCLGFIALAYS  
VKSRLDKMVGDLIRAQAYAFATKCLNIWALIVRIITILLISIIIPVLIFQVYQQIRRHLYG  
QELCP

***IFITM3P6:***

ENSG00000258352  
GRCh38: 12:47,135,324-47,138,370:-1

TTATAATAAAGGAAATGAATACCAAAACATGATATATCTATCAAATTGGCC

AAAAAAAAAAAAAAAAAGAAAGAAATTGAATGGTGAAGTACTGGTGAAAGTATGGAGGAAAA  
AGGCTACTGTACCCTTTTGGTGGAAAGTGTAACTTTGAATGCTCTCCTGGAGAGTAACTTG  
TTCTTATCTATAAAAATCTTTTTTTTTTTTTTTGGAGAACCATCCCAGCAACCCAACCACAG  
CTGGTTCTCCCTGGAGACCATGAACCACACTGTCCAAACCCTCTTCACTCCTGCCAACAC  
CGGCCGCTCCACCAACCATGAGATGCTCAAGGAGAAGCATGAGGTGGCTGTGCTGGGGGC  
ACCCCAACCCCTGTGCCTCCAGCGTTACCATGATCCACATCTGCAGTGAGACCTCCGT  
GCCCCACCATGTCGTCTGGTCCCTATTCAACACCCTCTTCAAGAATTCCTGCTGCCCGGA  
CTTCATAGCATTTCATCTACTCTGTGAAGTCTAGGACAGGAAGTCTATGGACAGGAAGATG  
GTTGGTGACCCTGACTGGGGCCCAGGCCTGTGTCTCCACTGCCAAGTGCCTGAACATCTGG  
GCCCTGGCTCTGGGCATCCTCCTGACCATTCTGCTCATCATCTCAGTGCTGATCTTC  
CAA

> Open Reading Frame (ORF)

MNHTVQTLFTPANTGRSTNHEMLKEKHEVAVLGAPHNPVPPAFTMIHICS  
ETSVPDHVVWSLFNNTLTKNSCCPDFIAFIYSVKSRTGSLWTGRWLVT

**IFITM3P7:**

>ENSG00000233419:ENST00000413189.1 cds:processed\_pseudogene  
GRCh38:1:25125053:25125704:-1

GCTTGGACTACAGGCGCATACCACCATGGCCAGCTAATTTTTTTTTATTATTTGCATAGAT  
GGGGTCTCACTATGTTGTCCAGGCTAGTCTCAAACCTCCTGGGCTCAAGTAATCTGTCCAC  
CTTGGCCTCCCAAAGTTCTGGAATTACAGGTGTGAGCCACCATGCCCAACCCAGTCTACA  
GTTTTCTTATTGTGTTGTCTTCAACAAAATTATAAGCCATTAACAATTTCAAAAATGTCT  
TTGAGTAACCATGAACCACACTGCCCAAACCTTCTTCACTCCCGCCAACACCGGCTGCCC  
CCTAGACTATCAGATGCTCAAGTAGGAGCATGAGGTGGCTGTGCTGGGGGCACCCCAAA  
CTCTGCTCCCCGAGGTCCACCGTGATCCACATCCACAGCGAGACCTCTGTGCCCAACCA  
TGTTGTCTGGTCCCTGTTCAACACCCTCTTCATGAACTCCTGCTGCCTGGGCTTCATAGC  
AGTCACCTACTCCATGAAGTCTAGGGACAGGAAGATGGTTGGCGACCTAACCGGGGGCCA  
GGCCTGTGCCTCCACCGCCAAGTGCCTGAACGTCTGGGCCCTGGTTCTGGGCATCCTCAT  
GAGCATTCTGCTCATCTTCATCCCAGTGTTGATCTTTCAAGTCTATCAATAG

> Open Reading Frame (ORF)

MNHTAQTFFTPANTGCPLDYQLK

**IFITM3P8:**

>ENSG00000271377:ENST00000603849.1 cds:processed\_pseudogene  
GRCh38:8:60905809:60906452:1

TCACTTCCCGGGTTCAAGTGATTCTCCTGCCTCAGCCTCCAGAGTAGGTGGGATTACAGG  
TGTCCACCAGCATGCCTGGCTAATTTTTTTTTTTTTTTTTTTTTTTAGTAGAGAAGGGGTTTC  
GCCATGTTAGCCAGGATGGTTTTGATCTCCTGACCTCGGCCTCCCAAAGTGCTGGGATTA  
TAGGCGTGAGCCACCATGCCTTATTACATTTTTTAAAGAGCTCCTGACAGCTGGTCTTT  
GCTGGACACCATGAACCACATGGTCCAAACCTTCTTCACTCCCTCAAACACCGGCCACCC  
TGCAACTATGAGATGCTCAGGGAGGAGTAAGAGGTGGCTGTGCTGAGGGTGCCCTACAAC  
CCTCCTCCCTCAACGTCCGCCATGATCCACATCTGCAGCAAGACCTCTGTGCCCGACCAT  
GTCATCTGGTCCCCGTTTAAACAACCGCTTCATGAACTCCTGCTGCTTGGGCTTCATAGCA  
TTCGCCTATTTCCATGAAGTCTAGGAACAGGAAAATGGTTGGTGACCTGAGCAGGACCCAG  
GCCTATGCCCTCCCAAGTGCCTGAACATCTGGGCCCTGGTTCTGCACATCCTTATG  
ATCATTCTGTTTATCATCATCCCAGTGTTGATCTTTCAAGTCTATCAATAG

> Open Reading Frame (ORF)

MNHMVQTFIPSNTHPATMRCSGRSKRWLC

**IFITM3P9:**

>ENSG00000271134:ENST00000604586.1 cds:processed\_pseudogene  
GRCh38:2:60682873:60683494:-1

GCCTCCCAAAGTGTGTGATTACAGGCGTGAGCCACTGTGCCCGCCTCATCCATCTACT  
TTCTAGATTCCAAAATTGTATTGACATCTCTCGTATTCTCCTATCACTGCTCTCGTTTTTC  
TCTGTTCCATAGGTTTTATGCATTTTTAAACCCTTTGTTGTCATTTTAGTGAGAATTCAAGG  
GGAAACAGAAATAAATGCAGCTGGAGAACCATCCCACCATCCCGACCACAACCTGATCTTC  
CCTGGACACGATCAACCACGCTGTCCAAACCGTCTTCACTCCCGCCAACACCAGCCACCC  
CCTCAACTATGAAATGCTCAAGGAGGAGCATGAGGTGGCTGTGCTGAGGGTGCCCCACAA  
CCCTGTTCCCCCGACATCCACCGTGATCCACATCCACAGTGAGACCCTGTGCCAGCCA  
TGTCGTCTGGTCCCTGTTCAACTCTCTTCATGAATGTGATGCCATCTGGGCTTCATAGC  
ATTCACCTACTCCGTGAAGTCTAGGGACAGGAAGATGGTTGGCGACCTGACTGGGGCCCA  
GGCCTACGCCTCCACTGCCAAGTGCCTGAACGTTTGACCCCTCATCCTGGGCATCCGTGT  
GACCACAACACTCATCATCCTT

> Open Reading Frame (ORF)

MNHAVQTVFTPANTSHPLNYEMLKEEHEVAVLRVPHNPVPTSTVIHIHS  
ETTVPSHVVWSLNFNTLFMN

**IFITM4P:**

>ENSG00000235821:ENST00000441380.1 cds:processed\_pseudogene  
GRCh38:6:29750729:29751398:-1

TATTA AAAACTCTCCAGGTGGTTCTGTGAAGTGGCTAGGTTTGAGGACCACTGGCTAGAT  
GTTCCAAAGAGTAAGAGACGTGTGTGTTGGGGACGAGATGATTCTTTCAGTAGAAAGAGG  
CTTTTGCATGGTGTTTTATTATCGAGATATAATTTATGTGCCACGTAATTTACCATTTAA  
AAATGTACAGTCCAGGGCCCACTCAGAACCATCCCAGCAACCTGACCACAGCTGGTCTTT  
GCTGGACACCATCAACCACACTGCCCAAACCTTCTTCATTCCTGCCAACAGTGGCTGCC  
TCCCCCGCCCCCAACCCAGCTATGAGATGCTCAAGGAGGAGCATGAGGTGGCTGTGCT  
GGGGGCGCCCCACAACCCTGCTCCCCCAATGTCCACCATGATCCATATCTGCAGCGAGAC  
CTCCGTGTCTGACTATGTTGTCTGGTCCCTGTCCAACATCCTCTTCATGAACCCCACTG  
CCTGGGATTCATAGCATTCCACTACTCCCTGAAGTCTAGGGACAGGAAGATGGTTGGAGA  
CCTGACTGGGGCCAGGCCTATGCCTCCACTGCCAAGTACCTGAACATCTGAGGCCCTGAT  
TGTGTGCATCATCATGACCATTCTGCTCACCGTCATCATCCTAGTGTGATCTTCCAAGT  
CTGTTCGATAG

> Open Reading Frame (ORF)

MNHTAQTFPIPANS GCPPPPNPSYEMLKEEHEVAVLGAPHN PAPP MSTM  
IHICSETSVSDYVWVWSL SNILFMNPHCLGFIAFTYSLKSRDRK MVDLTG  
AQAYASTAKYLNI

**IFITM8P:**

>ENSG00000215096:ENST00000522529.1 cds:processed\_pseudogene  
GRCh38:8:63408814:63409457:1

GAGCAACAAAATTCTTGGCCCCATTCCAGACCTACTGAATCATTA ACTCTGGAAGAGATG  
CCCTGCAATCTGTGTTTTAACAGTTTATGTAGGTAAGCTTGGCTGAAGTTTACCTTTGCA  
TTGACTGATAACAGGAAAAGGGCTTCTTCATTA AATTAATAGTTCAGGAGAAATTGAAAC  
TACTGGGGAGAGGGAGGGCCATTGAGAACCATCCCAGCAACCCGACCACAGCTGGTCTT  
CCCTGGACACCATCAACCACCTTCCAAACCTTCTTCACTCCTGCCAACAGCGGCCACC  
CCCGCAATTATGAGATGCTCAAGGAGGAGCATAAGGTGGCTGTGGTGGGGGCGCCCCAAA  
ACCCTGCTCCCCGATGTCCACCATGATCCACTTCCACAGTGAGACCTCCATGCCTGACC  
ATGTCGTCTGGTCGCTGTTCAACACCCTCTTCATGAACTCTGGCTGCCTGTGCTTCACAG  
CATTTGTGTA CTATGAAGTCTAGGGAGAGGAAGAAGGTTGGTGACTTGACCAGGGCCC  
AGGCCTATACCTCCACTGCCAAGTGCCTGAACATCTGGGCCCTGATCGTGGACATTGTCA  
TGACCATTCTGCTCATCATCATCCCAGTGTGATCTTCCAAGTCTATGTGA

> Open Reading Frame (ORF)

MNHTFQTFPTPANS GHPRNYEMLKEEHKVA VVGAPQNPAPP MSTMIHFHS

ETSMPDHVVWSLFNTLFMNSGCLCFTAFVYSMKSRERKKVVDLTRAQAYT  
STAKCLNIWALIVDIVMTILLIIIPVLIFQVY

***IFITM9P*** :

>ENSG00000213275:ENST00000535743.1 cds:processed\_pseudogene  
GRCh38:11:69303412:69304057:-1

CTGGCAGGCAGAGCATCCTTTTCAGCAGCCTGAGTCGGACCCATCCTTCCCCTGCTCCCTA  
ATCCATTCAAGCGAAAGCCAAAGGCCTTAAAAAGTCCTGCAAGGGTAGGACCAACAAACT  
CACCCCTTTGAGAGGAGAAGGGGGCCCCATAAGAATACACTAGAGCGGAGAAAACGAAACT  
ACTAGGGAAAAGGGAGGGCCCACTGAGAATCACCCAGAAACCCGACCACCACTGGTCTTC  
GCTGGACACCATGAACCACACTGTCCAAACCTTCTTCTCTCCTGTCAACAGCAGCCAGCC  
CCCCAACTATGAGATGCTCAAGGAGGAACACGACGTGGCTGTGCGGGGGCACCCACAA  
CCCTGCTCCCCCGACATCCACTGTGATCCACATCCGCAGCGAGACCTCCGTGCCCGACCA  
TGTTGTCTGGTCCCTGTTCAACGCCCTCTTCATGAACCCCTGCCGCCCGGGCTTCAAGGC  
ATTTCGCTACTCCGTGTAGTCTAGGGACAGGAAGATGGTTGGCGACCTGACTGGGGCCCA  
GGCCTATGCCTCCACCGCCAAGTGCCTGAACATCTGGGCCCTGATTTTGGGCATCCTCAC  
GACCATTCTGCTCATCGTCATCCCAGTGTGATCATCCAAGCCAT

> Open Reading Frame (ORF)  
MNHTVQTFVSPVNSSQPPQL
